# Supplementary material
Source: Springer Nature journal article supplement (https://www.springermedizin.de/resource/supplementary/12883_2008_202_MOESM1_ESM.pdf/9457068)
Supplement: MOESM1 [file 9457068]

**Figure: Schematic diagram of study design**

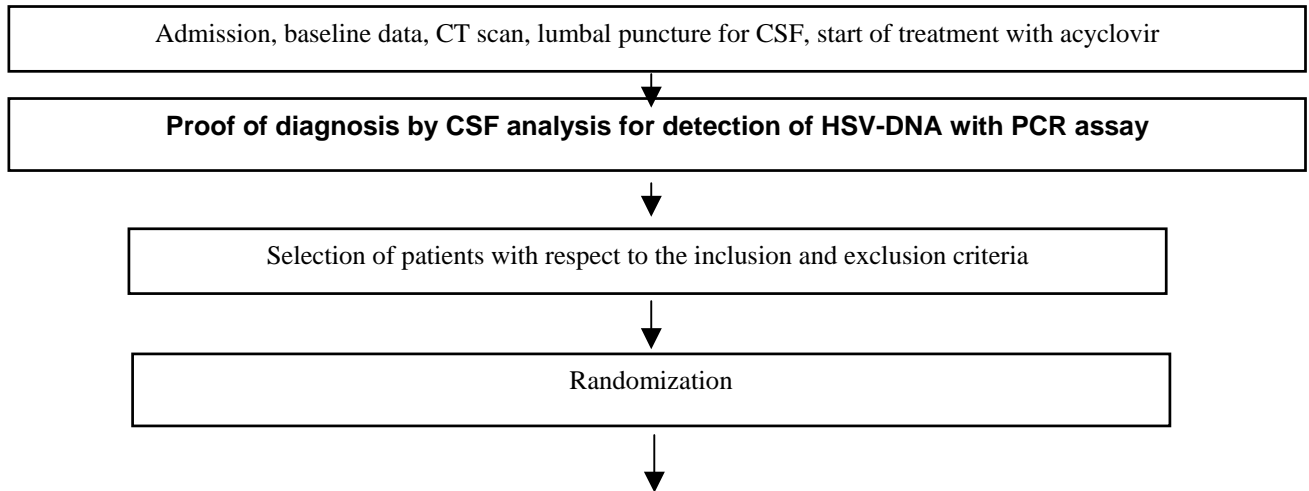

|                                | <b>Experimental group:</b>                                                                                                                                                                                                                                                                                                              | <b>Control group:</b>                                                                                                                                                                                                                                                                                |
|--------------------------------|-----------------------------------------------------------------------------------------------------------------------------------------------------------------------------------------------------------------------------------------------------------------------------------------------------------------------------------------|------------------------------------------------------------------------------------------------------------------------------------------------------------------------------------------------------------------------------------------------------------------------------------------------------|
| Day 0 of study                 | <p><b>Treatment with adjuvant dexamethasone</b></p> <p>Aciclovir: 10mg/kg BW acyclovir (intravenously, 1 hour infusion) every 8 hours for 14 days</p> <p>Dosage adaptation in case of decreased creatinine clearance</p> <p>Dexamethasone 40 mg intravenously every 24 hours for 4 days.</p>                                            | <p><b>Treatment with placebo</b></p> <p>Aciclovir: 10mg/kg BW acyclovir (intravenously, 1 hour infusion) every 8 hours for 14 days</p> <p>Dosage adaptation in case of decreased creatinine clearance</p> <p>Placebo identical in appearance to dexamethasone infusion every 24 hours for 4 days</p> |
| Day 0                          | <ul style="list-style-type: none"> <li>Neurological examination, GCS, pre-encephalitis Barthel Index, pre-encephalitis mRS, Neuropsychological test, seizures.</li> <li>Cranial MRI-scan as soon as possible after positive HSV in CSF, at the latest 48 hours after initiation of study medication (Dexamethasone/Placebo).</li> </ul> |                                                                                                                                                                                                                                                                                                      |
| Day 7                          | <ul style="list-style-type: none"> <li>Physical and neurological examinations.</li> </ul>                                                                                                                                                                                                                                               |                                                                                                                                                                                                                                                                                                      |
| Discharge at the latest Day 30 | <ul style="list-style-type: none"> <li>Physical and neurological examinations, mRS, GOS, Barthel index, seizures.</li> </ul>                                                                                                                                                                                                            |                                                                                                                                                                                                                                                                                                      |
| 6 months after randomization   | <ul style="list-style-type: none"> <li>Physical, neurological and neuropsychological examinations, mRS, GOS, quality of life (EuroQol 5D), Barthel-Index, seizures.</li> <li>Cranial MRI-scan.</li> </ul>                                                                                                                               |                                                                                                                                                                                                                                                                                                      |
| 12 months after randomization  | <ul style="list-style-type: none"> <li>Physical and neurological examinations, mRS, GOS, quality of life (EuroQol 5D), Barthel-Index, seizures.</li> </ul>                                                                                                                                                                              |                                                                                                                                                                                                                                                                                                      |
